# Supplementary material
Source: PubMed Central journal article supplement (PMC5138863)
Supplement: NIHMS832746-supplement-Supp.pdf [file NIHMS832746-supplement-Supp.pdf]

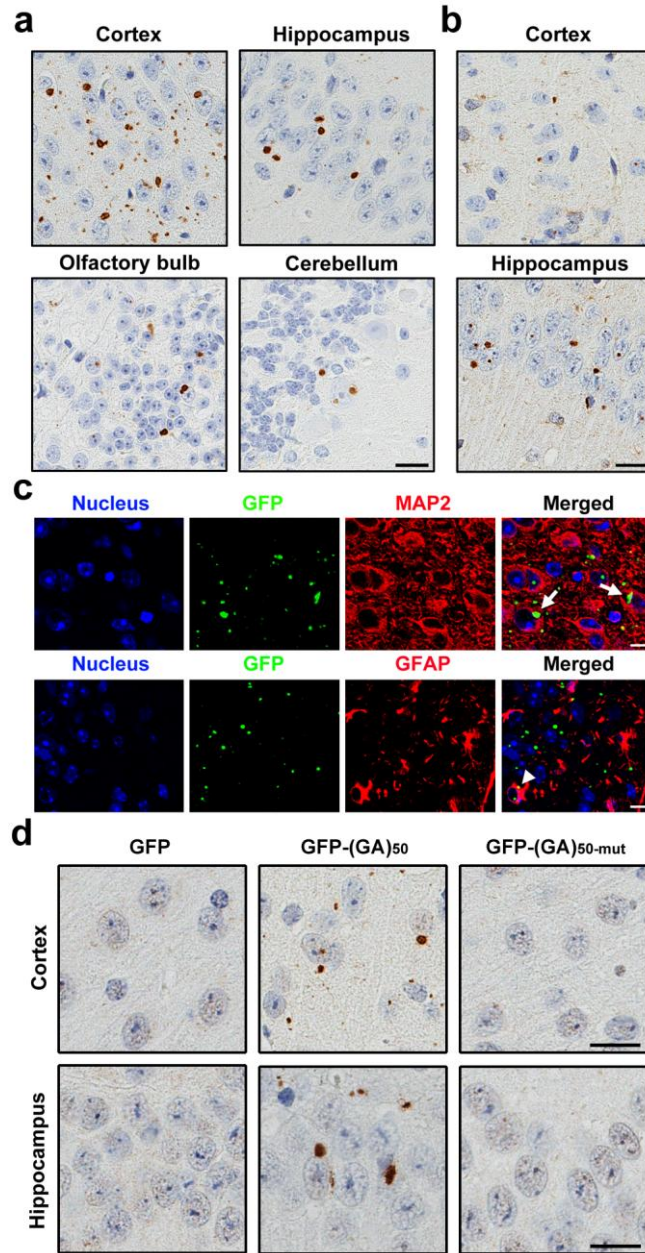

**Supplementary Figure 1**

**Neuropathology of poly(GA) inclusions in the brains of GFP-(GA)<sub>50</sub> mice.**

Immunohistochemical analysis in the indicated brain regions of GFP-(GA)<sub>50</sub> mice with **(a)** anti-GFP antibody or **(b)** anti-GA antibody. Scale bars, 20  $\mu$ m. **(c)** Double immunofluorescence staining in the cortex of GFP-(GA)<sub>50</sub> mice for the indicated proteins. The arrows point to MAP2-positive neurons and the arrowhead to an astrocyte. Scale bars, 10  $\mu$ m. **(d)** Immunohistochemical analysis in the cortex and hippocampus of GFP, GFP-(GA)<sub>50</sub> and GFP-(GA)<sub>50</sub>-mut mice with an anti-ubiquitin antibody. Scale bars, 20  $\mu$ m.

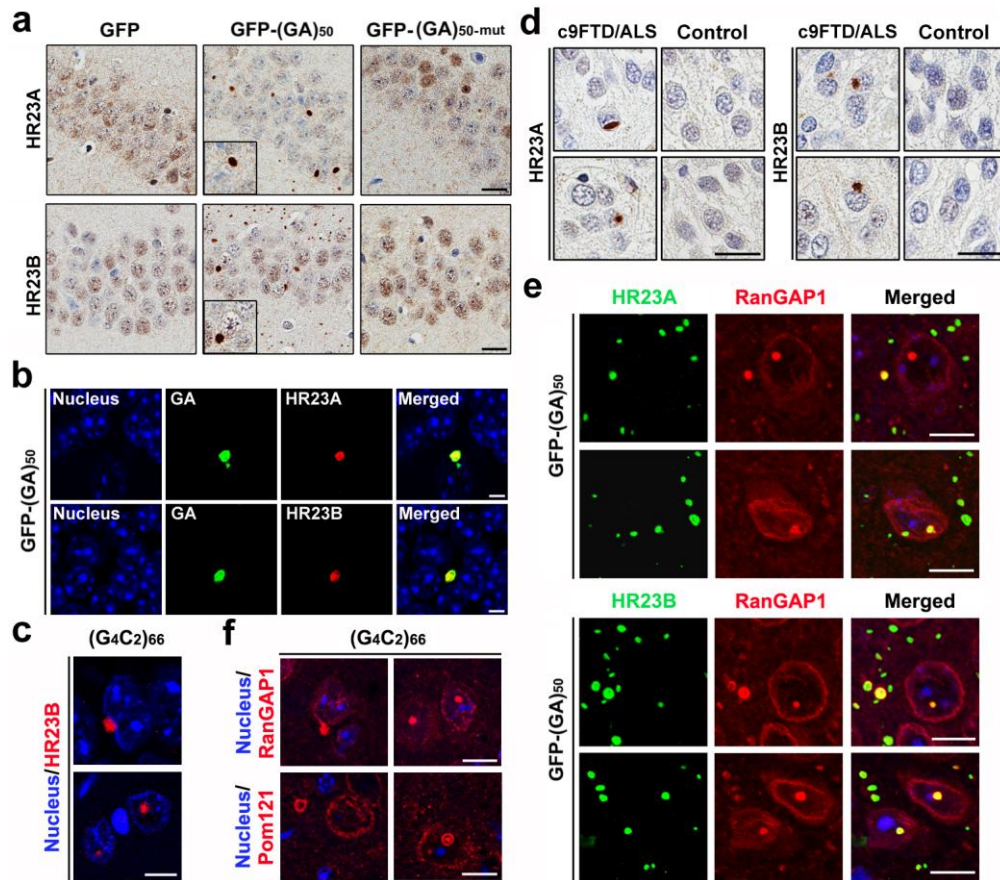

**Supplementary Figure 2**

**HR23, RanGAP1 and Pom121 form inclusions in the brains of GFP-(GA)<sub>50</sub> and (G<sub>4</sub>C<sub>2</sub>)<sub>66</sub> mice.**

(a) Immunohistochemical analysis of HR23A and HR23B proteins in the hippocampus of 6 month-old GFP, GFP-(GA)<sub>50</sub> and GFP-(GA)<sub>50-mut</sub> mice. Scale bars, 20 μm. (b) Double immunofluorescence staining for GFP-(GA)<sub>50</sub> and HR23A or HR23B in the hippocampus of 6 month-old GFP-(GA)<sub>50</sub> mice. Scale bars, 5 μm. (c) Immunofluorescence staining for HR23B in the cortex of 6 month-old (G<sub>4</sub>C<sub>2</sub>)<sub>66</sub> mice. Scale bar, 10 μm. (d) Representative images of immunohistochemical analysis of HR23A and HR23B in the hippocampus of c9FTD/ALS subjects (n = 7) or healthy controls (n = 4). Scale bars, 20 μm. (e) Double immunofluorescence staining for RanGAP1 and either HR23A or HR23B in the cortex of 6 month-old GFP-(GA)<sub>50</sub> mice. Scale bars, 10 μm. (f) Immunofluorescence staining for RanGAP1 or Pom121 in the cortex of 6 month-old (G<sub>4</sub>C<sub>2</sub>)<sub>66</sub> mice. Scale bars, 10 μm.

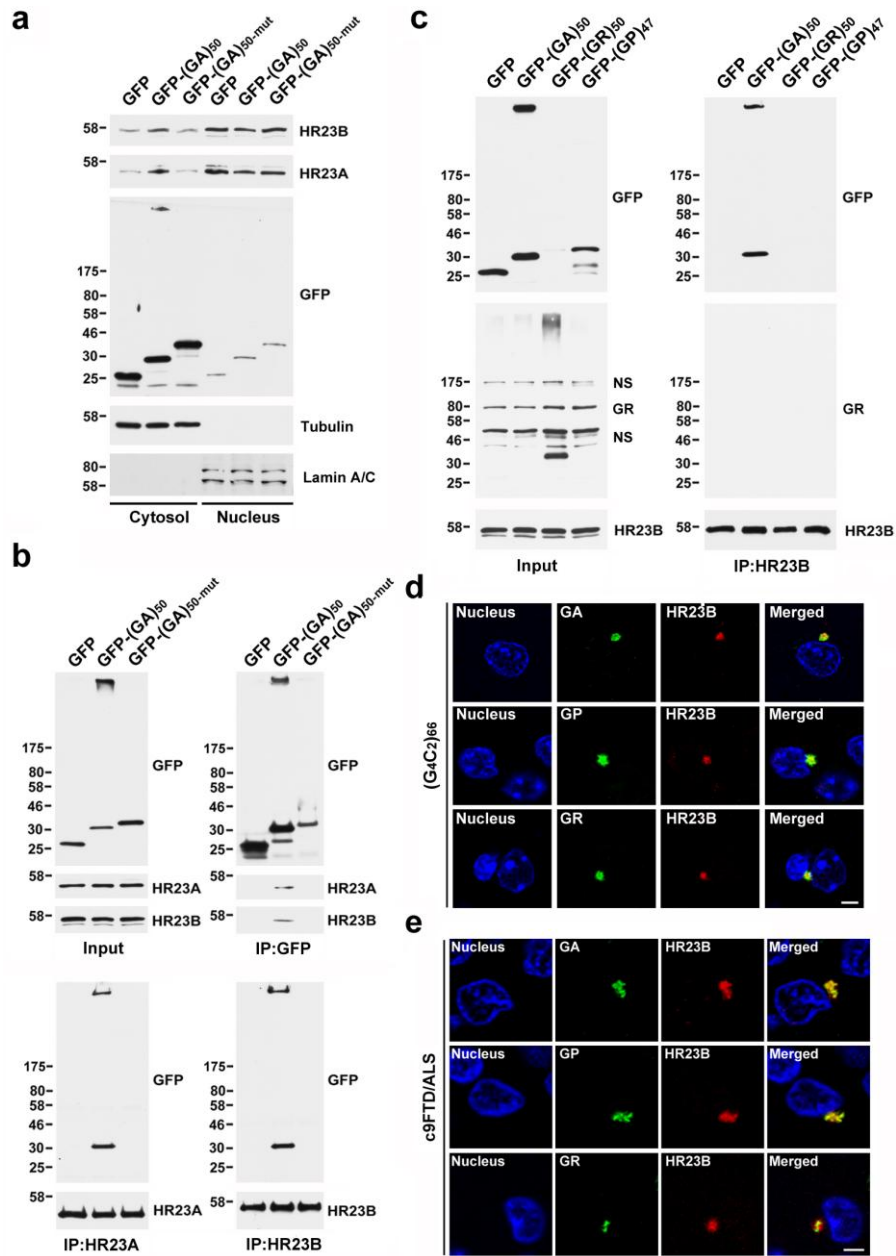

### Supplementary Figure 3

#### HR23 proteins interact with, and are sequestered by, poly(GA) proteins.

(a) Cytosolic and nuclear fractions were prepared from HEK293T cells exogenously expressing GFP, GFP-(GA)<sub>50</sub> or GFP-(GA)<sub>50-mut</sub>, followed by immunoblots analysis using the indicated antibodies. Tubulin and Lamin A/C were used as cytoplasmic and nuclear markers, respectively. (b) Protein complexes were immunoprecipitated from the indicated input lysates (top left) from HEK293T cells exogenously expressing GFP, GFP-(GA)<sub>50</sub> or GFP-(GA)<sub>50-mut</sub> with antibodies to GFP, HR23A or HR23B, followed by immunoblot analysis using the indicated antibodies. (c) Protein complexes were immunoprecipitated from the indicated input lysates (left, top and bottom) from HEK293T cells exogenously expressing GFP, GFP-(GA)<sub>50</sub>, GFP-(GR)<sub>50</sub>, or GFP-(GP)<sub>47</sub> with an antibody to HR23B, followed by immunoblot analysis using antibodies to GFP and poly(GR). (d) Double immunofluorescence staining for HR23B and poly(GA), poly(GP) or poly(GR) in brains of 6 month-old (G<sub>4</sub>C<sub>2</sub>)<sub>66</sub> mice. Scale bar, 5  $\mu$ m. (e) Double immunofluorescence staining for HR23B and poly(GA), poly(GP) or poly(GR) in the hippocampus of c9FTD/ALS patients. Scale bar, 5  $\mu$ m. For **a-c**, full-length immunoblots are presented in **Supplementary Figure 10**.

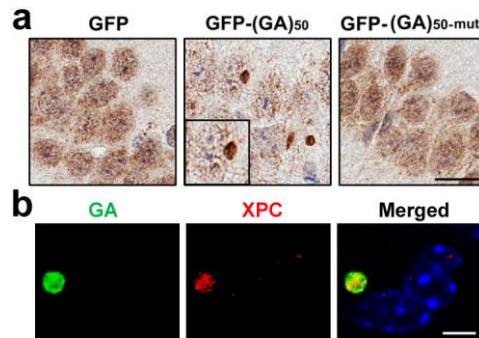

**Supplementary Figure 4**

**XPC is sequestered into poly(GA) inclusions in the hippocampus of GFP-(GA)<sub>50</sub> mice.**

(a) Immunohistochemical analysis of XPC in the hippocampus of GFP, GFP-(GA)<sub>50</sub> and GFP-(GA)<sub>50</sub>-mut mice. Scale bar, 20  $\mu$ m. (b) Double immunofluorescence staining of XPC and poly(GA) proteins in the hippocampus of GFP-(GA)<sub>50</sub> mice. Scale bar, 5  $\mu$ m.

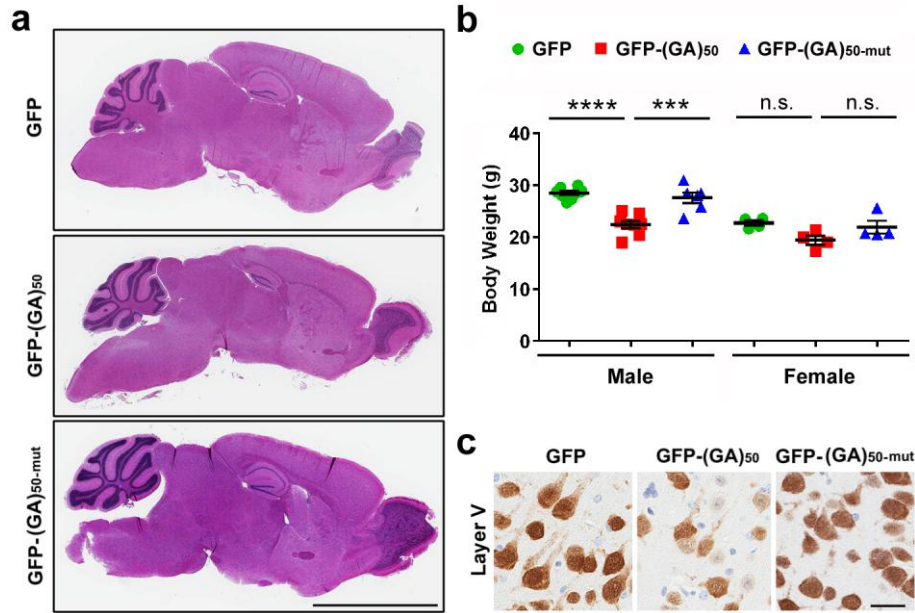

**Supplementary Figure 5**

**Analysis of brain morphology, body weight and motor cortex neurons in GFP-(GA)<sub>50</sub> mice.**

(a) Gross morphological analysis with hematoxylin and eosin staining of brains from 6 month-old GFP, GFP-(GA)<sub>50</sub> and GFP-(GA)<sub>50-mut</sub> mice. Scale bar, 5 mm. (b) The mean body weight of 6 month-old male and female GFP, GFP-(GA)<sub>50</sub> and GFP-(GA)<sub>50-mut</sub> mice, using 6–8 male mice or 4 female mice per group. Data are presented as mean ± s.e.m. Male mice:  $P < 0.0001$ , as analyzed by one-way ANOVA; \*\*\*\* $P < 0.0001$  and \*\*\* $P = 0.0002$ , Tukey's *post-hoc* analysis. Female mice:  $P = 0.0724$ , one-way ANOVA. n.s., not significant. (c) Immunohistochemical analysis of NeuN in layer V of the motor cortex of GFP, GFP-(GA)<sub>50</sub> and GFP-(GA)<sub>50-mut</sub> mice. Scale bar, 30  $\mu\text{m}$ .

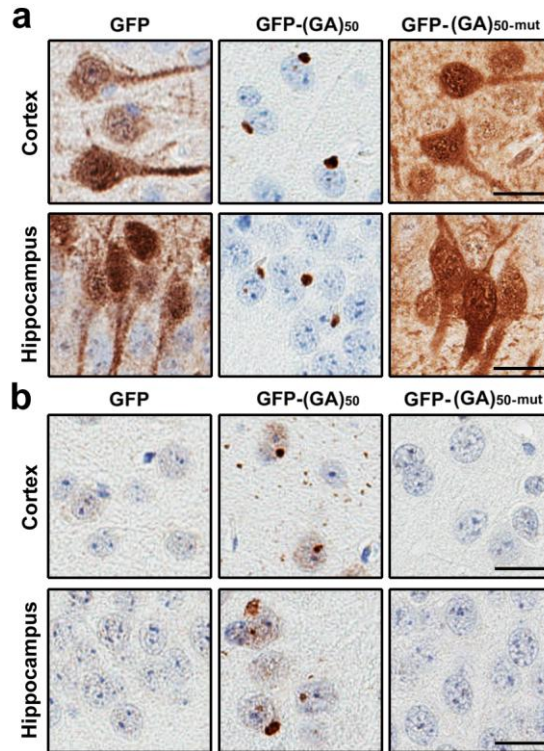

**Supplementary Figure 6**

**Poly(GA) inclusions in 4- to 6-week-old GFP-(GA)<sub>50</sub> mice.**

Immunohistochemical analysis of cortex and hippocampus of GFP, GFP-(GA)<sub>50</sub> and GFP-(GA)<sub>50</sub>-mut mice with (a) anti-GFP antibody or (b) anti-ubiquitin antibody. Scale bars, 20 μm.

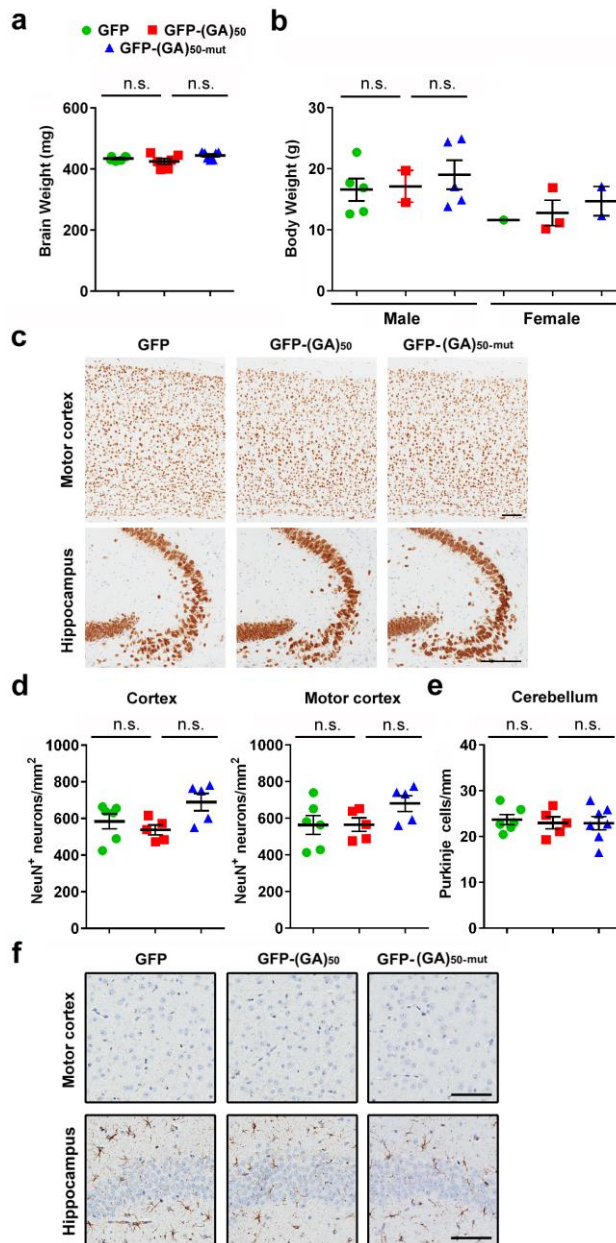

## Supplementary Figure 7

### No signs of neurodegeneration were observed in 4- to 6-week-old GFP-(GA)<sub>50</sub> mice.

(a) Graph showing the mean brain weight of mice expressing GFP, GFP-(GA)<sub>50</sub> or GFP-(GA)<sub>50-mut</sub> (n = 5–7 per group). (b) The mean body weight of male and female GFP, GFP-(GA)<sub>50</sub> and GFP-(GA)<sub>50-mut</sub> mice using 2–5 male mice or 1–3 female mice. (c) Representative images of NeuN-labeled cells in the motor cortex and hippocampus of GFP, GFP-(GA)<sub>50</sub> or GFP-(GA)<sub>50-mut</sub> mice. Scale bars, 200  $\mu$ m. (d) Quantification of the number of NeuN-positive cells in the cortex (left) or motor cortex (right) of GFP, GFP-(GA)<sub>50</sub> or GFP-(GA)<sub>50-mut</sub> mice (n = 5–7 per group). (e) Quantification of the number of Purkinje cells in the cerebellum of GFP, GFP-(GA)<sub>50</sub> or GFP-(GA)<sub>50-mut</sub> mice (n = 5–7 per group). (f) Representative images of GFAP staining to identify reactive astrocytes in the motor cortex and hippocampus of GFP, GFP-(GA)<sub>50</sub> or GFP-(GA)<sub>50-mut</sub> mice. Scale bars, 100  $\mu$ m. Data are presented as mean  $\pm$  s.e.m., and analyzed by one-way ANOVA;  $P = 0.0988$  (a),  $P = 0.7026$  (b),  $P = 0.0563$  (d, Cortex),  $P = 0.1609$  (d, Motor cortex) and  $P = 0.9042$  (e). n.s., not significant.

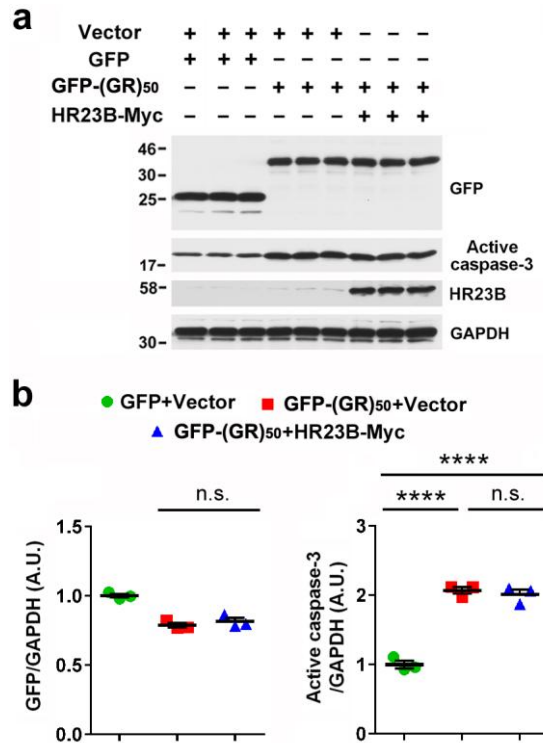

Supplementary Figure 8

Exogenous HR23B does not decrease poly(GR) levels nor attenuate poly(GR)-induced neurotoxicity.

(a) Immunoblot and (b) densitometric analysis of immunoblots for the indicated proteins to determine their levels of expression in primary neurons transduced to express GFP-(GR)<sub>50</sub> or GFP in the presence or absence of exogenous Myc-tagged HR23B. Data are presented as mean  $\pm$  s.e.m. from 3 separate experiments. In **b**, left:  $P = 0.0005$ , one-way ANOVA;  $P = 0.6252$  (GFP-(GR)<sub>50</sub>+Vector vs. GFP-(GR)<sub>50</sub>+HR23B-Myc), Tukey's *post-hoc* analysis. Right:  $P < 0.0001$ , one-way ANOVA; \*\*\*\* $P < 0.0001$  and  $P = 0.7798$  (GFP-(GR)<sub>50</sub>+Vector vs. GFP-(GR)<sub>50</sub>+HR23B-Myc), Tukey's *post-hoc* analysis. n.s., not significant. For **a**, full-length immunoblots are presented in **Supplementary Figure 10**.



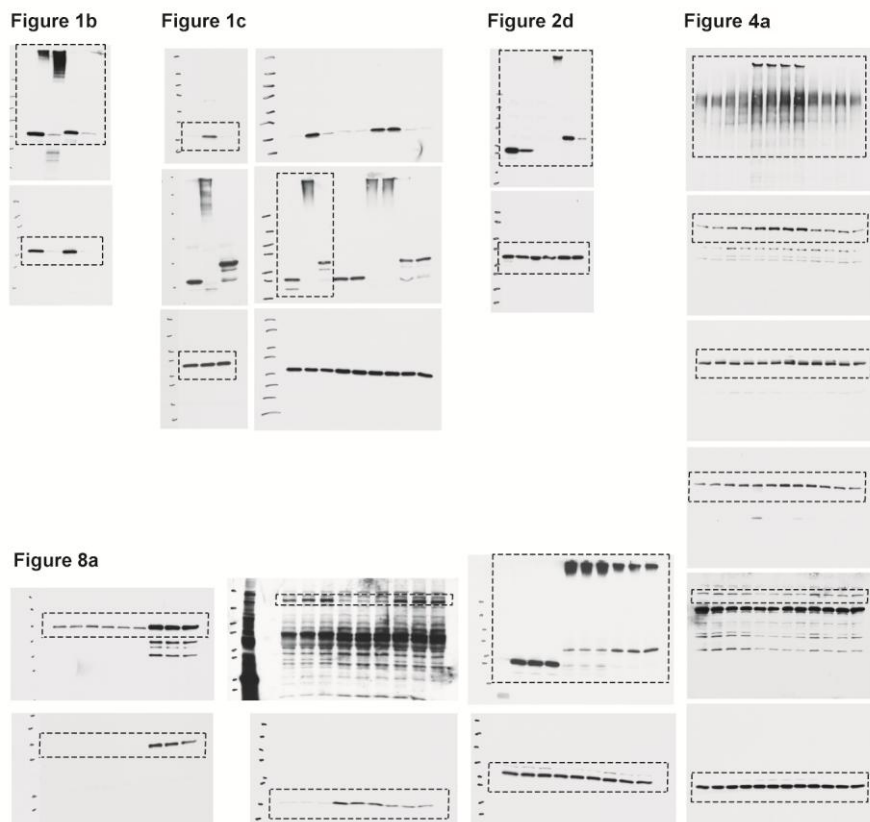

**Supplementary Figure 9**

**Full-length immunoblots for main figures.**

The region delineated by the box on each blot is the image shown in the corresponding figure.

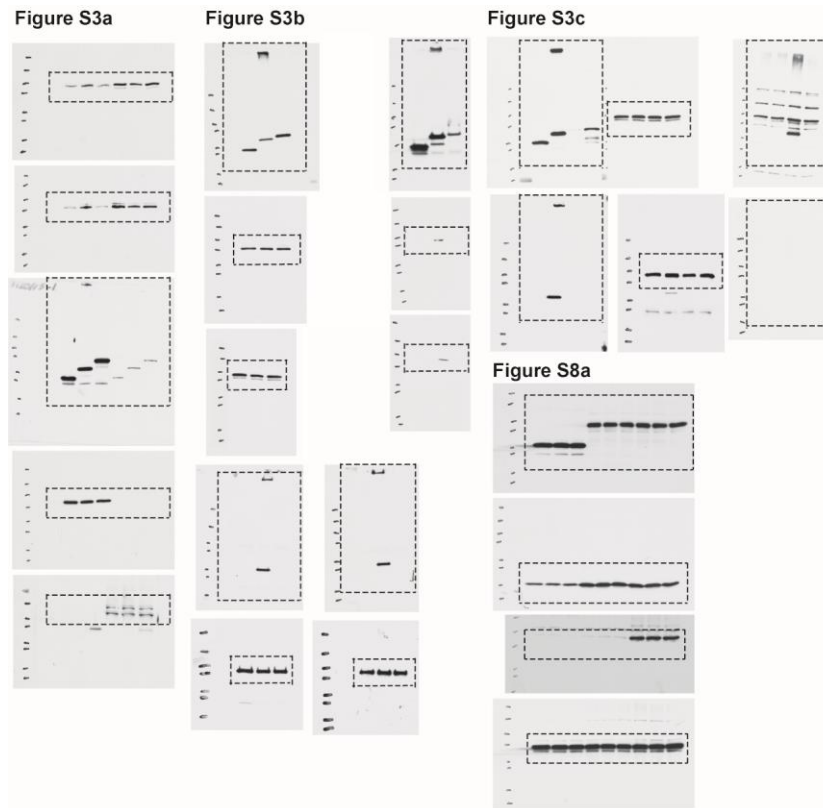

**Supplementary Figure 10**

**Full-length immunoblots for supplementary figures.**

The region delineated by the box on each blot is the image shown in the corresponding figure.

**Supplementary Table 1. Regional distribution of GFP, GFP-(GA)<sub>50</sub> and GFP-(GA)<sub>50-mut</sub> in the mouse brain**

| <b>Brain region</b> | <b>GFP</b> | <b>GFP-(GA)<sub>50</sub></b> | <b>GFP-(GA)<sub>50-mut</sub></b> |
|---------------------|------------|------------------------------|----------------------------------|
| Cortex              | +++        | +++                          | +++                              |
| Hippocampus         | ++/+++     | ++/+++                       | ++/+++                           |
| Thalamus            | +          | +                            | +                                |
| Olfactory bulb      | + / ++     | +                            | +                                |
| Cerebellum          | +          | +                            | +                                |

+: mild, ++: moderate, +++: severe

**Supplementary Table 2. Regional distribution of HR23A/B, RanGAP1 and Pom121 pathology in the brains of GFP-(GA)<sub>50</sub> mice**

| <b>Brain region</b> | <b>HR23A/B</b> | <b>RanGAP1</b> | <b>Pom121</b> |
|---------------------|----------------|----------------|---------------|
| Cortex              | +++            | +++            | ++            |
| Hippocampus         | ++/+++         | ++/+++         | +             |
| Thalamus            | +              | +              | +             |
| Olfactory bulb      | +              | +              | +             |
| Cerebellum          | +              | +              | +             |

+: mild, ++: moderate, +++: severe

**Supplementary Table 3. Summary of human subjects**

| <b>Case #</b> | <b>Path Dx</b> | <b>Age</b> | <b>Gender</b> | <b>C9ORF72 mutation</b> |
|---------------|----------------|------------|---------------|-------------------------|
| 1             | FTLD           | 73         | Male          | Yes                     |
| 2             | FTLD-MND       | 68         | Male          | Yes                     |
| 3             | FTLD           | 74         | Male          | Yes                     |
| 4             | FTLD           | 72         | Male          | Yes                     |
| 5             | FTLD-MND       | 55         | Female        | Yes                     |
| 6             | ALS            | 68         | Female        | Yes                     |
| 7             | ALS            | 68         | Female        | Yes                     |
| 8             | Normal         | 66         | Male          | No                      |
| 9             | Normal         | 74         | Male          | No                      |
| 10            | Normal         | 62         | Female        | No                      |
| 11            | Normal         | 60         | Female        | No                      |

ALS, amyotrophic lateral sclerosis; FTLD, frontotemporal lobar degeneration; MND, motor neuron disease
